# Supplementary material for: Both Nonsmoking Youth and Smoking Adults Like Sweet and Minty E-liquid Flavors More Than Tobacco Flavor
Source: PubMed Central journal article supplement — Chem Senses. 2021 Mar 4;46:bjab009. doi: 10.1093/chemse/bjab009 (PMC8130505; doi:10.1093/chemse/bjab009), 2021-03-04
Supplement: bjab009_suppl_supplementary_material.pdf [file bjab009_suppl_supplementary_material.pdf]

# APPENDIX

## **Both non-smoking youth and smoking adults like sweet and minty e-liquid flavors more than tobacco flavor**

Erna JZ Krüseemann, MSc. <sup>1,2\*</sup>; Loes van Tiel, MSc. <sup>3</sup>; Jeroen LA Pennings, PhD <sup>1</sup>; Wim Vaessen, PhD <sup>3</sup>; Kees de Graaf, Prof <sup>2</sup>; Reinskje Talhout, PhD <sup>1</sup>; Sanne Boesveldt, PhD <sup>2</sup>

Institutional addresses:

<sup>1</sup> National Institute for Public Health and the Environment (RIVM), Centre for Health Protection, P.O. Box 1 3720 BA Bilthoven, The Netherlands

<sup>2</sup> Wageningen University & Research, Division of Human Nutrition and Health (Bode 62), P.O. Box 17 6700 AA Wageningen, The Netherlands

<sup>3</sup> Essensor, Rubensstraat 215-A, 6717 VE Ede, The Netherlands

\*Correspondence to be sent to: [reinskje.talhout@rivm.nl](mailto:reinskje.talhout@rivm.nl)

Appendix Table A1: Survey questions and answer options that were combined, recoded, and presented into different answer categories (see Table 8.2 in the main text).

| <b>Survey item</b>        | <b>Question</b>                                                      | <b>Answer options</b>                                                                                                                                                                                                                                                                                                                                                    | <b>Recoding scheme</b>                                          |
|---------------------------|----------------------------------------------------------------------|--------------------------------------------------------------------------------------------------------------------------------------------------------------------------------------------------------------------------------------------------------------------------------------------------------------------------------------------------------------------------|-----------------------------------------------------------------|
| Education level           | What is your highest degree of education?                            | 1 = Primary school<br>2 = Pre-vocational secondary education (in Dutch: VMBO), senior general secondary education (HAVO), middle school pre-university education (VWO onderbouw), secondary vocational education level 1 (MBO1)<br>3 = High school or secondary vocational education<br>4 = Bachelor's degree<br>5 = Master's or doctorate degree                        | Low = 1 + 2<br>Middle = 3<br>High = 4 + 5                       |
| Intention to start vaping | To what extent do you intend to start vaping?                        | 1 = I don't want to start vaping<br>2 = I want to start, but don't know yet when<br>3 = I want to start, hopefully soon<br>4 = I really want to start, but don't know yet when<br>5 = I really want to start, planned to start in next three months<br>6 = I really want to start, planned to start in coming month<br>7 = I don't know                                  | No = 1<br>Low = 2 + 3<br>High = 4 + 5 + 6<br>Don't know = 7     |
| Intention to quit smoking | To what extent do you intend to quit smoking in the coming 6 months? | 1 = I don't want to quit<br>2 = I think I should quit, but don't want to<br>3 = I want to quit, but don't know yet when<br>4 = I want to quit, hopefully soon<br>5 = I really want to quit, but don't know yet when<br>6 = I really want to quit, planned to quit in next three months<br>7 = I really want to quit, planned to quit in coming month<br>8 = I don't know | No = 1 + 2<br>Low = 3 + 4<br>High = 5 + 6 + 7<br>Don't know = 8 |

Questions not mentioned in the current table were presented in the main text with their actual answer options (no recoding needed).

Appendix Table A2: Mean liking ratings ( $\pm$  SE) for individual e-liquids (n=30) and for 4 groups of products with similar flavors (for classification, see Table A8.4), assessed by adolescent non-smokers (n = 41), young adult non-smokers (n = 42), and adult smokers (n = 56) on a 9-point labeled hedonic scale.

|                                                | <b>Adolescent non-smokers</b> |           | <b>Young adult non-smokers</b> |           | <b>Adult smokers</b> |           |
|------------------------------------------------|-------------------------------|-----------|--------------------------------|-----------|----------------------|-----------|
| Peppermint                                     | 6.9                           | $\pm 0.3$ | 6.7                            | $\pm 0.3$ | 6.7                  | $\pm 0.2$ |
| Wine gum                                       | 6.9                           | $\pm 0.3$ | 6.7                            | $\pm 0.3$ | 6.4                  | $\pm 0.3$ |
| Menthol                                        | 6.9                           | $\pm 0.3$ | 6.7                            | $\pm 0.3$ | 6.1                  | $\pm 0.3$ |
| Bubblegum                                      | 6.4                           | $\pm 0.3$ | 6.2                            | $\pm 0.3$ | 6.7                  | $\pm 0.2$ |
| Anise                                          | 6.4                           | $\pm 0.2$ | 5.7                            | $\pm 0.3$ | 6.3                  | $\pm 0.2$ |
| Watermelon                                     | 6.6                           | $\pm 0.3$ | 6.0                            | $\pm 0.3$ | 5.9                  | $\pm 0.3$ |
| Citrus fruits                                  | 6.1                           | $\pm 0.3$ | 6.2                            | $\pm 0.3$ | 6.0                  | $\pm 0.2$ |
| Raspberry                                      | 5.8                           | $\pm 0.3$ | 5.9                            | $\pm 0.3$ | 6.4                  | $\pm 0.2$ |
| Mojito                                         | 6.2                           | $\pm 0.3$ | 5.9                            | $\pm 0.3$ | 6.0                  | $\pm 0.3$ |
| Cola                                           | 6.4                           | $\pm 0.3$ | 5.9                            | $\pm 0.3$ | 5.7                  | $\pm 0.3$ |
| Energy drink                                   | 6.2                           | $\pm 0.3$ | 5.7                            | $\pm 0.3$ | 5.9                  | $\pm 0.2$ |
| Vanilla                                        | 5.1                           | $\pm 0.3$ | 5.8                            | $\pm 0.3$ | 5.9                  | $\pm 0.2$ |
| Jasmine tea                                    | 5.3                           | $\pm 0.3$ | 5.3                            | $\pm 0.3$ | 5.8                  | $\pm 0.2$ |
| Lavender                                       | 5.4                           | $\pm 0.3$ | 5.8                            | $\pm 0.3$ | 5.2                  | $\pm 0.3$ |
| Pineapple                                      | 5.7                           | $\pm 0.3$ | 5.4                            | $\pm 0.3$ | 5.3                  | $\pm 0.3$ |
| Unflavored                                     | 5.2                           | $\pm 0.2$ | 5.3                            | $\pm 0.2$ | 4.9                  | $\pm 0.1$ |
| Syrup waffle                                   | 4.6                           | $\pm 0.3$ | 5.2                            | $\pm 0.4$ | 4.5                  | $\pm 0.3$ |
| Cheesecake                                     | 4.0                           | $\pm 0.3$ | 4.8                            | $\pm 0.4$ | 4.6                  | $\pm 0.3$ |
| Espresso                                       | 3.9                           | $\pm 0.3$ | 4.1                            | $\pm 0.3$ | 4.8                  | $\pm 0.3$ |
| Caramel                                        | 3.9                           | $\pm 0.3$ | 4.6                            | $\pm 0.3$ | 4.4                  | $\pm 0.3$ |
| American blend *                               | 3.5 <sup>A</sup>              | $\pm 0.3$ | 3.8 <sup>A</sup>               | $\pm 0.3$ | 4.9 <sup>B</sup>     | $\pm 0.2$ |
| Clove                                          | 3.7                           | $\pm 0.3$ | 3.6                            | $\pm 0.3$ | 4.3                  | $\pm 0.3$ |
| Oriental *                                     | 3.0 <sup>A</sup>              | $\pm 0.2$ | 4.3 <sup>B</sup>               | $\pm 0.3$ | 4.3 <sup>B</sup>     | $\pm 0.3$ |
| Tobacco_b                                      | 3.2                           | $\pm 0.3$ | 3.6                            | $\pm 0.2$ | 4.1                  | $\pm 0.3$ |
| Hazelnut                                       | 3.1                           | $\pm 0.3$ | 3.8                            | $\pm 0.3$ | 3.6                  | $\pm 0.3$ |
| Tobacco_a                                      | 3.2                           | $\pm 0.2$ | 3.2                            | $\pm 0.2$ | 3.7                  | $\pm 0.3$ |
| Peanut                                         | 2.9                           | $\pm 0.3$ | 3.5                            | $\pm 0.3$ | 3.5                  | $\pm 0.3$ |
| Tobacco_c                                      | 2.9                           | $\pm 0.3$ | 2.8                            | $\pm 0.3$ | 3.2                  | $\pm 0.3$ |
| Cigar                                          | 2.9                           | $\pm 0.3$ | 2.9                            | $\pm 0.3$ | 3.1                  | $\pm 0.2$ |
| Whiskey                                        | 2.4                           | $\pm 0.3$ | 2.1                            | $\pm 0.2$ | 2.4                  | $\pm 0.2$ |
| <b>Groups of products with similar flavors</b> |                               |           |                                |           |                      |           |
| Tobacco flavors *                              | 3.1 <sup>A</sup>              | $\pm 0.3$ | 3.4 <sup>B</sup>               | $\pm 0.3$ | 3.9 <sup>C</sup>     | $\pm 0.2$ |
| Minty flavors                                  | 6.9                           | $\pm 0.3$ | 6.7                            | $\pm 0.3$ | 6.4                  | $\pm 0.2$ |
| Other non-sweet flavors *                      | 3.2 <sup>A</sup>              | $\pm 0.3$ | 3.4 <sup>AB</sup>              | $\pm 0.3$ | 3.7 <sup>B</sup>     | $\pm 0.3$ |
| Sweet flavors                                  | 5.7                           | $\pm 0.3$ | 5.7                            | $\pm 0.3$ | 5.7                  | $\pm 0.3$ |

Products were ranked from highest to lowest mean liking score across all users (n = 139). The same data are visualized in Figure 1 (main text).

\* Different letters in superscript indicate significant differences in a row (i.e., between user groups).

**Appendix Table A3:** Mean familiarity ratings ( $\pm$  SE) for individual e-liquids ( $n = 30$ ) and for 4 groups of products with similar flavors (for classification, see Table A8.4), assessed by adolescent non-smokers ( $n = 41$ ), young adult non-smokers ( $n = 42$ ), and adult smokers ( $n = 56$ ) on a 100-unit Visual Analog Scale.

|                                                | <b>Adolescent<br/>non-smokers</b> | <b>Young adult<br/>non-smokers</b> | <b>Adult smokers</b> |
|------------------------------------------------|-----------------------------------|------------------------------------|----------------------|
| Peppermint                                     | 82.9 $\pm$ 3.3                    | 89.7 $\pm$ 1.5                     | 80.1 $\pm$ 3.3       |
| Menthol                                        | 83.1 $\pm$ 2.6                    | 81.2 $\pm$ 3.2                     | 72.2 $\pm$ 3.7       |
| Anise                                          | 76.6 $\pm$ 4.0                    | 73.2 $\pm$ 3.4                     | 72.0 $\pm$ 3.3       |
| Watermelon                                     | 78.9 $\pm$ 3.9                    | 70.8 $\pm$ 3.5                     | 59.5 $\pm$ 4.2       |
| Energy drink                                   | 68.6 $\pm$ 4.6                    | 69.7 $\pm$ 3.4                     | 66.3 $\pm$ 3.6       |
| Mojito                                         | 65.1 $\pm$ 4.3                    | 67.8 $\pm$ 3.9                     | 66.3 $\pm$ 3.4       |
| Wine gum                                       | 76.6 $\pm$ 3.6                    | 64.3 $\pm$ 3.4                     | 58.9 $\pm$ 3.5       |
| Cola                                           | 71.7 $\pm$ 3.4                    | 62.7 $\pm$ 3.9                     | 63.3 $\pm$ 3.9       |
| Espresso                                       | 67.4 $\pm$ 4.8                    | 64.1 $\pm$ 4.6                     | 58.3 $\pm$ 4.6       |
| Bubblegum                                      | 68.7 $\pm$ 3.8                    | 61.0 $\pm$ 3.5                     | 58.6 $\pm$ 3.6       |
| Lavender                                       | 61.7 $\pm$ 4.5                    | 63.4 $\pm$ 4.1                     | 52.3 $\pm$ 3.9       |
| Citrus fruit                                   | 60.2 $\pm$ 3.9                    | 55.5 $\pm$ 3.7                     | 51.5 $\pm$ 3.7       |
| Raspberry                                      | 58.9 $\pm$ 4.8                    | 54.0 $\pm$ 4.1                     | 52.1 $\pm$ 3.7       |
| Jasmine tea                                    | 47.4 $\pm$ 4.2                    | 53.6 $\pm$ 3.8                     | 59.6 $\pm$ 3.2       |
| Syrup waffle                                   | 59.3 $\pm$ 4.4                    | 58.8 $\pm$ 3.9                     | 46.0 $\pm$ 4.0       |
| Pineapple                                      | 61.1 $\pm$ 4.5                    | 53.3 $\pm$ 3.9                     | 48.5 $\pm$ 4.1       |
| Vanilla                                        | 48.4 $\pm$ 4.9                    | 46.0 $\pm$ 4.2                     | 48.1 $\pm$ 4.1       |
| Hazelnut                                       | 40.1 $\pm$ 4.7                    | 51.3 $\pm$ 5.2                     | 47.7 $\pm$ 4.1       |
| Caramel                                        | 41.3 $\pm$ 4.4                    | 49.6 $\pm$ 4.3                     | 47.9 $\pm$ 4.2       |
| Clove                                          | 42.9 $\pm$ 4.9                    | 43.8 $\pm$ 4.8                     | 49.9 $\pm$ 4.5       |
| Cheesecake                                     | 41.8 $\pm$ 4.7                    | 50.2 $\pm$ 4.0                     | 44.8 $\pm$ 3.9       |
| Peanut                                         | 44.3 $\pm$ 4.8                    | 51.0 $\pm$ 4.1                     | 36.4 $\pm$ 3.8       |
| American blend                                 | 30.3 $\pm$ 3.9                    | 33.3 $\pm$ 3.8                     | 47.0 $\pm$ 4.1       |
| Oriental                                       | 30.7 $\pm$ 3.8                    | 35.8 $\pm$ 4.1                     | 41.8 $\pm$ 4.1       |
| Whiskey                                        | 34.4 $\pm$ 5.0                    | 34.7 $\pm$ 3.9                     | 39.6 $\pm$ 4.0       |
| Tobacco_b                                      | 31.4 $\pm$ 3.9                    | 33.5 $\pm$ 3.8                     | 38.5 $\pm$ 3.8       |
| Tobacco_a                                      | 30.3 $\pm$ 4.1                    | 29.8 $\pm$ 3.2                     | 36.6 $\pm$ 4.0       |
| Tobacco_c                                      | 25.6 $\pm$ 3.8                    | 28.9 $\pm$ 3.7                     | 34.8 $\pm$ 3.8       |
| Cigar                                          | 32.9 $\pm$ 3.0                    | 27.0 $\pm$ 3.0                     | 30.9 $\pm$ 3.3       |
| Unflavored                                     | 21.3 $\pm$ 3.2                    | 21.5 $\pm$ 4.0                     | 18.9 $\pm$ 3.6       |
| <b>Groups of products with similar flavors</b> |                                   |                                    |                      |
| Tobacco flavors                                | 30.2 $\pm$ 3.7                    | 31.4 $\pm$ 3.6                     | 38.3 $\pm$ 3.8       |
| Minty flavors                                  | 83.0 $\pm$ 2.9                    | 85.5 $\pm$ 2.3                     | 76.1 $\pm$ 3.5       |
| Other non-sweet flavors                        | 45.8 $\pm$ 4.9                    | 49.0 $\pm$ 4.5                     | 46.4 $\pm$ 4.2       |
| Sweet flavors                                  | 61.6 $\pm$ 4.2                    | 59.6 $\pm$ 3.8                     | 56.0 $\pm$ 3.8       |

Products were ranked from highest to lowest mean liking score across all users ( $n = 139$ ). Familiarity did not significantly differ between user groups, for any of the e-liquids.

**Appendix Table A4:** Mean sweetness ratings ( $\pm$  SE) for individual e-liquids ( $n = 30$ ) and for 4 groups of products with similar flavors, assessed by adolescent non-smokers ( $n = 41$ ), young adult non-smokers ( $n = 42$ ), and adult smokers ( $n = 56$ ) on a 100-unit Visual Analog Scale.

|                                                | <b>Adolescent<br/>non-smokers</b> | <b>Young adult<br/>non-smokers</b> | <b>Adult smokers</b> | <b>Assigned<br/>group</b> |
|------------------------------------------------|-----------------------------------|------------------------------------|----------------------|---------------------------|
| Energy drink                                   | 78.6 $\pm$ 3.2                    | 83.6 $\pm$ 2.4                     | 77.4 $\pm$ 2.7       | Sweet                     |
| Wine gum                                       | 81.9 $\pm$ 2.7                    | 77.7 $\pm$ 2.8                     | 72.4 $\pm$ 2.8       | Sweet                     |
| Bubblegum                                      | 78.5 $\pm$ 3.0                    | 74.3 $\pm$ 3.0                     | 71.2 $\pm$ 2.8       | Sweet                     |
| Watermelon                                     | 79.1 $\pm$ 3.2                    | 76.1 $\pm$ 2.8                     | 63.4 $\pm$ 3.7       | Sweet                     |
| Raspberry                                      | 75.7 $\pm$ 3.2                    | 69.2 $\pm$ 3.4                     | 69.4 $\pm$ 2.7       | Sweet                     |
| Citrus fruit                                   | 75.8 $\pm$ 2.4                    | 70.1 $\pm$ 3.2                     | 66.3 $\pm$ 3.3       | Sweet                     |
| Pineapple                                      | 70.7 $\pm$ 3.5                    | 70.4 $\pm$ 3.0                     | 63.1 $\pm$ 3.7       | Sweet                     |
| Anise                                          | 62.5 $\pm$ 3.4                    | 57.2 $\pm$ 2.9                     | 62.0 $\pm$ 3.1       | Sweet                     |
| Cheesecake                                     | 55.4 $\pm$ 4.1                    | 62.0 $\pm$ 4.1                     | 52.4 $\pm$ 3.5       | Sweet                     |
| Vanilla                                        | 54.3 $\pm$ 4.1                    | 56.5 $\pm$ 3.9                     | 55.1 $\pm$ 2.9       | Sweet                     |
| Caramel                                        | 46.9 $\pm$ 4.0                    | 64.4 $\pm$ 3.7                     | 51.2 $\pm$ 3.7       | Sweet                     |
| Syrup waffle                                   | 51.8 $\pm$ 4.3                    | 53.8 $\pm$ 4.2                     | 53.6 $\pm$ 3.9       | Sweet                     |
| Cola                                           | 56.3 $\pm$ 4.1                    | 44.9 $\pm$ 3.9                     | 52.0 $\pm$ 3.5       | Sweet                     |
| Jasmine tea                                    | 47.9 $\pm$ 3.7                    | 43.0 $\pm$ 4.0                     | 57.8 $\pm$ 3.4       | Sweet                     |
| Mojito                                         | 52.2 $\pm$ 3.4                    | 44.8 $\pm$ 3.5                     | 46.9 $\pm$ 3.3       | Sweet                     |
| Lavender                                       | 50.2 $\pm$ 3.2                    | 41.0 $\pm$ 3.3                     | 44.0 $\pm$ 3.5       | Sweet                     |
| Peppermint                                     | 51.0 $\pm$ 3.9                    | 37.2 $\pm$ 3.5                     | 42.8 $\pm$ 3.7       | Minty                     |
| Menthol                                        | 53.0 $\pm$ 4.0                    | 35.6 $\pm$ 3.9                     | 37.5 $\pm$ 3.6       | Minty                     |
| Hazelnut                                       | 33.0 $\pm$ 3.8                    | 42.4 $\pm$ 4.1                     | 37.9 $\pm$ 3.6       | Non-sweet                 |
| Tobacco_b                                      | 41.2 $\pm$ 4.4                    | 40.3 $\pm$ 3.9                     | 31.7 $\pm$ 3.6       | Tobacco                   |
| Oriental                                       | 34.0 $\pm$ 3.9                    | 39.6 $\pm$ 3.8                     | 37.4 $\pm$ 3.3       | Tobacco                   |
| Peanut                                         | 33.5 $\pm$ 4.5                    | 40.4 $\pm$ 3.9                     | 34.8 $\pm$ 3.8       | Non-sweet                 |
| Clove                                          | 34.1 $\pm$ 3.8                    | 33.2 $\pm$ 3.3                     | 39.4 $\pm$ 3.5       | Non-sweet                 |
| American blend                                 | 30.9 $\pm$ 3.5                    | 35.4 $\pm$ 4.0                     | 37.7 $\pm$ 3.6       | Tobacco                   |
| Tobacco_a                                      | 27.8 $\pm$ 3.4                    | 34.8 $\pm$ 3.4                     | 34.1 $\pm$ 3.8       | Tobacco                   |
| Espresso                                       | 24.2 $\pm$ 3.2                    | 36.1 $\pm$ 3.8                     | 33.8 $\pm$ 3.5       | Non-sweet                 |
| Cigar                                          | 24.2 $\pm$ 3.2                    | 30.3 $\pm$ 3.4                     | 31.8 $\pm$ 3.5       | Tobacco                   |
| Tobacco_c                                      | 21.0 $\pm$ 3.1                    | 27.1 $\pm$ 3.1                     | 28.7 $\pm$ 3.4       | Tobacco                   |
| Whiskey                                        | 19.1 $\pm$ 2.7                    | 27.6 $\pm$ 3.0                     | 25.6 $\pm$ 3.5       | Non-sweet                 |
| Unflavored                                     | 29.3 $\pm$ 4.1                    | 22.9 $\pm$ 3.9                     | 17.2 $\pm$ 3.0       | N/A                       |
| <b>Groups of products with similar flavors</b> |                                   |                                    |                      |                           |
| Tobacco flavors                                | 29.8 $\pm$ 3.6                    | 34.6 $\pm$ 3.6                     | 33.5 $\pm$ 3.5       |                           |
| Minty flavors                                  | 52.0 $\pm$ 3.9                    | 36.4 $\pm$ 3.7                     | 40.2 $\pm$ 3.7       |                           |
| Other non-sweet flavors                        | 28.8 $\pm$ 3.6                    | 35.9 $\pm$ 3.6                     | 34.3 $\pm$ 3.6       |                           |
| Sweet flavors                                  | 63.6 $\pm$ 3.5                    | 61.8 $\pm$ 3.4                     | 59.9 $\pm$ 3.3       |                           |

Products were ranked from highest to lowest mean liking score across all users ( $n = 139$ ). Sweetness did not significantly differ between user groups, for any of the e-liquids. Categorization of the e-liquids (excluding unflavored) into 4 groups was based on similar flavor types and sweetness ratings (final column).
